# Supplementary material for: CH stretching vibration of N-methylformamide as a sensitive probe of its complexation: infrared matrix isolation and computational study
Source: Royal Society of Chemistry journal article supplement (doi:10.1039/c1cp20743a), 2011-01-01
Supplement: c1cp20743a.pdf [file c1cp20743a.pdf]

## CH stretching vibration of N-methylformamide as a sensitive probe of its complexation: infrared matrix isolation and computational study.

M. Sałdyka,<sup>1</sup> Z. Mielke,<sup>1\*</sup> K. Mierzwicki,<sup>1</sup> S. Coussan<sup>2</sup> and P. Roubin<sup>2</sup>

<sup>1</sup>Faculty of Chemistry, University of Wrocław, Joliot-Curie 14, Wrocław, Poland

<sup>2</sup>Physique des Interactions Ioniques et Moléculaires, UMR 6633, Université de Provence, Centre St-Jérôme, F-13397 Cedex 20, France.

\*zm@wchuwr.pl

### Supplementary information: additional computational details

**Figure S1.** The optimized structures of the *t*-NMF-Ar, N<sub>2</sub> and CO complexes.

**Figure S2.** The optimized structures of the *t*-NMF-(CO)<sub>2</sub> complexes.

**Table S1** Comparison of the calculated vibrational wavenumbers of the *trans* and *cis* isomers of NMF with the observed wavenumbers of the two NMF isomers isolated in argon and neon matrices.

**Table S2.** Selected structural parameters calculated for the NMF-Ar, NMF-N<sub>2</sub>, NMF-CO and NMF-H<sub>2</sub>O complexes.

**Table S3.** Wavenumbers (in cm<sup>-1</sup>) of the NMF-Ar complexes calculated by the MP2/6-311++G(2d,2p) method.

**Table S4.** Wavenumbers (in cm<sup>-1</sup>) of the NMF-N<sub>2</sub> complexes calculated by the MP2/6-311++G(2d,2p) method.

**Table S5.** Wavenumbers (in cm<sup>-1</sup>) of the NMF-CO complexes calculated by the MP2/6-311++G(2d,2p) method.

**Table S6.** Wavenumbers (in cm<sup>-1</sup>) of the (CO)<sub>α</sub>-NMF-(CO)<sub>β</sub> complexes calculated by the MP2/6-311++G(2d,2p) method (without CP-correction)

**Table S7.** Wavenumbers (in cm<sup>-1</sup>) of the NMF-H<sub>2</sub>O complexes calculated by the MP2/6-311++G(2d,2p) method.

**Table S8.** AIM atomic properties computed at MP2/6-311++G(2d,2p) level for NMF-Ar complexes (in atomic units)

**Table S9.** AIM atomic properties computed at MP2/6-311++G(2d,2p) level for NMF-N<sub>2</sub> complexes (in atomic units).

**Table S10.** AIM atomic properties computed at MP2/6-311++G(2d,2p) level for NMF-CO complexes (in atomic units).

**Table S11.** AIM atomic properties computed at MP2/6-311++G(2d,2p) level for NMF-H<sub>2</sub>O complexes (in atomic units).

**Table S12.** Changes of AIM atomic properties computed at MP2/6-311++G(2d,2p) level. All data reported in atomic units.

**Figure S1.** The optimized structures of the *t*-NMF complexes with Ar, N<sub>2</sub>, CO and H<sub>2</sub>O.

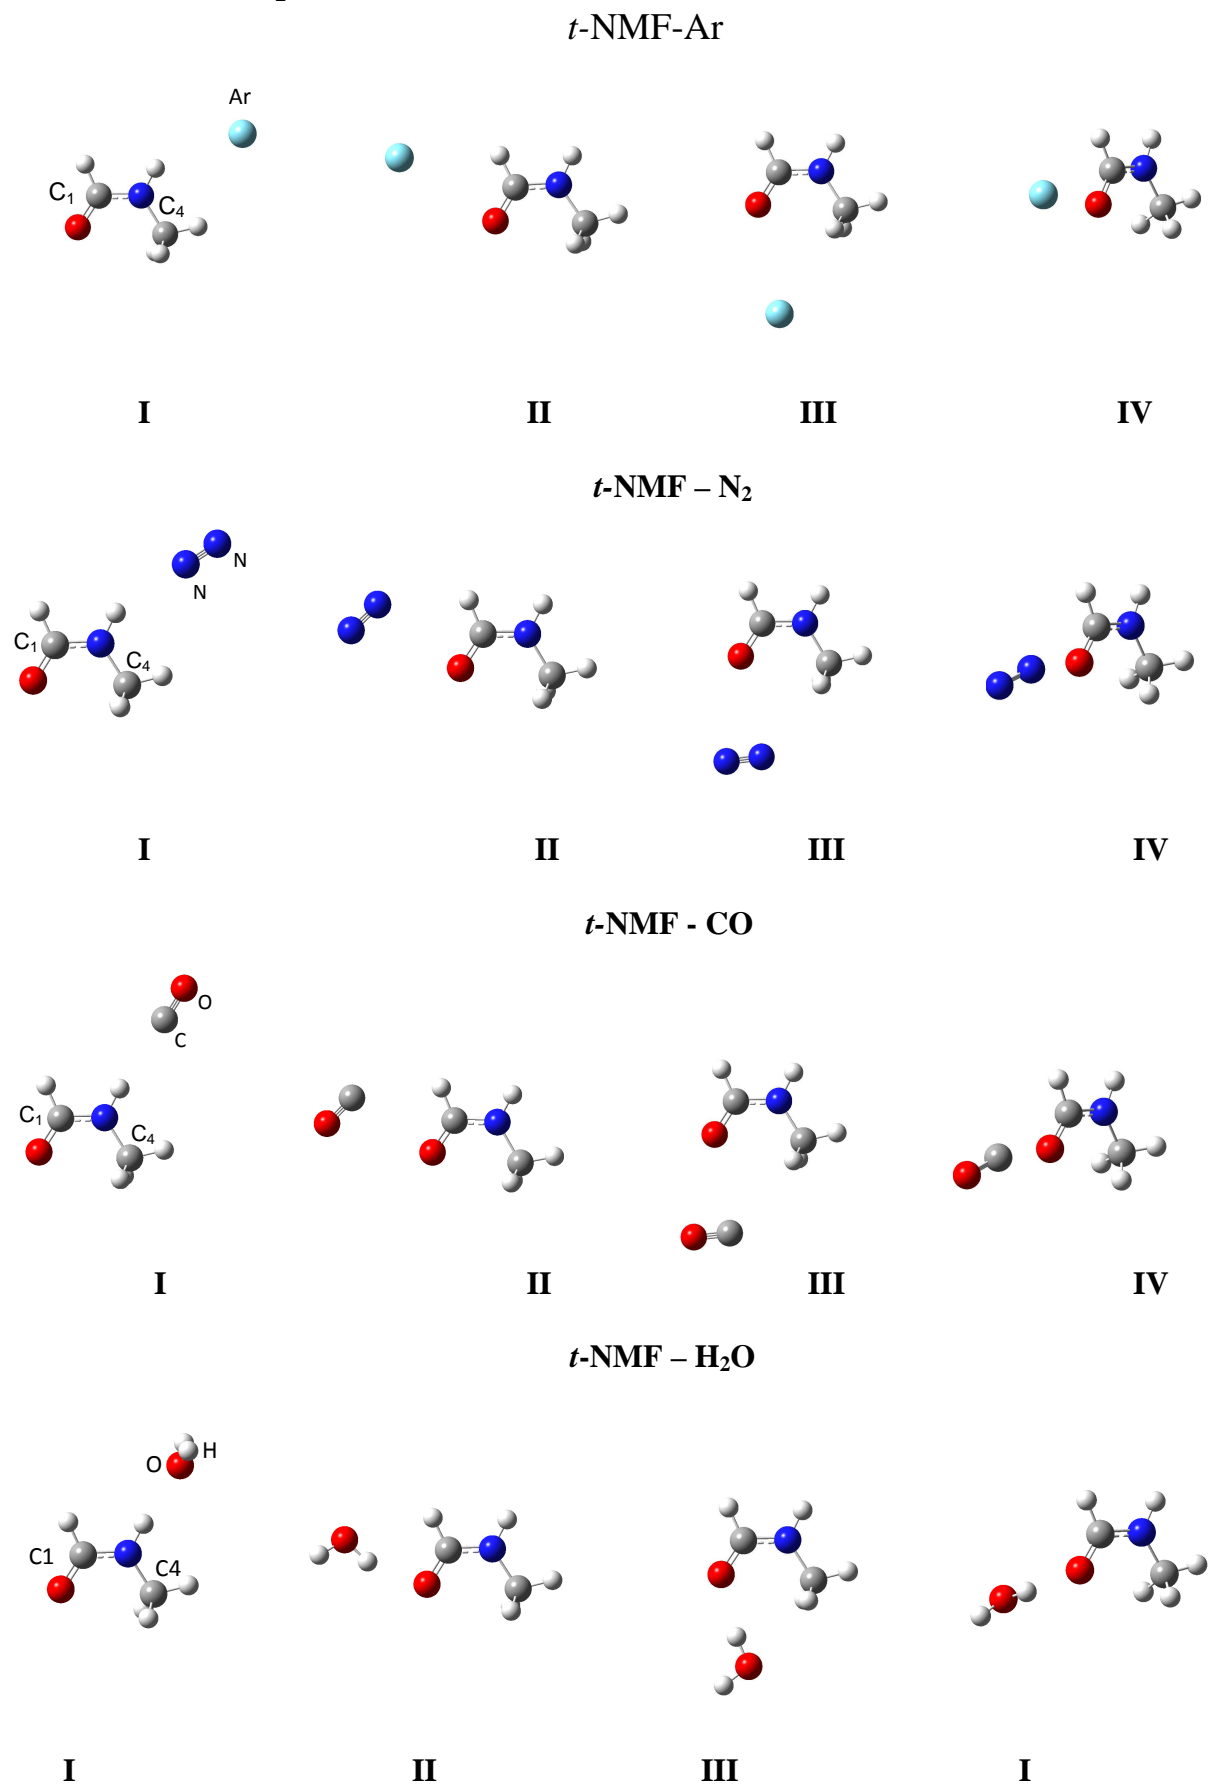

**Figure S2.** The optimized structures of the  $(\text{CO})_\alpha$ -NMF- $(\text{CO})_\beta$  complexes.

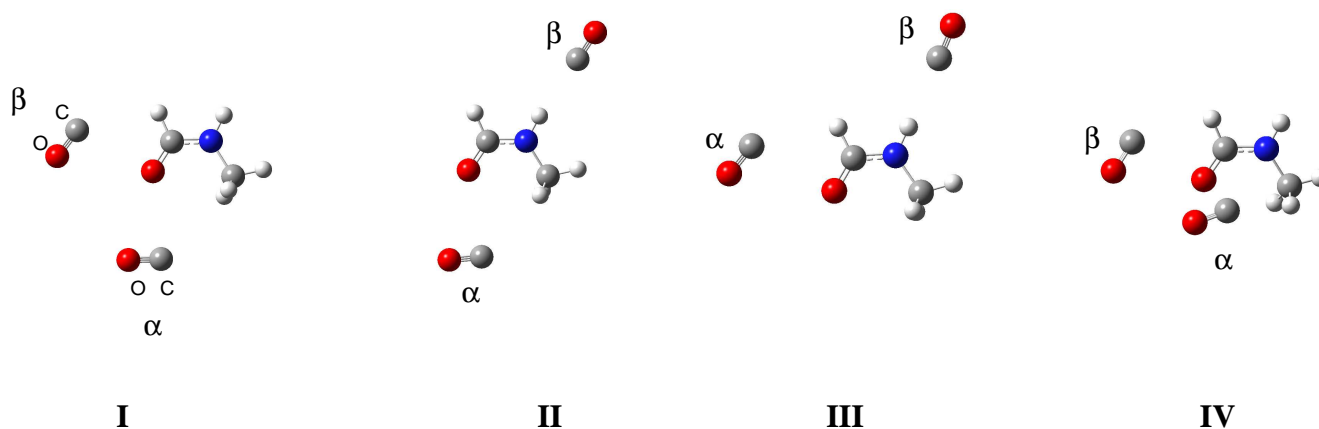

We calculated the two-body and three-body contributions to the interaction energies (kcal/mol) of the four optimized  $(\text{CO})_\alpha$ -NMF- $(\text{CO})_\beta$  complexes; these are collected in Table below. In parentheses the BSSE corrected values are presented. As one can see the contribution of the three-body terms to an overall interaction energy is very small. The calculations were performed according the scheme proposed by K. Mierzwicki and Z. Latajka (Chem. Phys. Lett. 380, 2003, 654).

Two-body and three-body contributions (kcal/mol) to the interaction energies of the four optimized  $(\text{CO})_\alpha$ -NMF- $(\text{CO})_\beta$  complexes.

|     | $\varepsilon^{(2)}(\text{NMF-CO1})$ | $\varepsilon^{(2)}(\text{NMF-CO2})$ | $\varepsilon^{(2)}(\text{CO1-CO2})$ | $\varepsilon^{(3)}(\text{NMF-CO1-CO2})$ |
|-----|-------------------------------------|-------------------------------------|-------------------------------------|-----------------------------------------|
| I   | -1.95 (-1.44)                       | -1.84 (-1.33)                       | -0.21 (-0.11)                       | 0.04 (0.01)                             |
| II  | -2.35 (-1.76)                       | -1.86 (-1.36)                       | -0.01 (-0.01)                       | -0.03 (-0.03)                           |
| III | -2.34 (-1.75)                       | -1.96 (-1.45)                       | -0.04 (-0.02)                       | -0.04 (-0.03)                           |
| IV  | -1.83 (-1.35)                       | -1.87 (-1.30)                       | -0.44 (-0.21)                       | -0.03 (-0.01)                           |

**Table S1** Comparison of the calculated vibrational wavenumbers of the *trans* and *cis* isomers of NMF<sup>a</sup> with the observed wavenumbers of the two NMF isomers isolated in argon and neon matrices.

| <i>trans</i> -NMF              |                                  |                                 |                                 | <i>cis</i> -NMF                |                                  |                                 |                                 | Assignment <sup>c</sup>                                                                                                     |
|--------------------------------|----------------------------------|---------------------------------|---------------------------------|--------------------------------|----------------------------------|---------------------------------|---------------------------------|-----------------------------------------------------------------------------------------------------------------------------|
| Harmonic freq/cm <sup>-1</sup> | Anharmonic freq/cm <sup>-1</sup> | Ar matrix freq/cm <sup>-1</sup> | Ne matrix freq/cm <sup>-1</sup> | Harmonic freq/cm <sup>-1</sup> | Anharmonic freq/cm <sup>-1</sup> | Ar matrix freq/cm <sup>-1</sup> | Ne matrix freq/cm <sup>-1</sup> |                                                                                                                             |
| 3695 (46) <sup>b</sup>         | 3550                             | 3493.5                          | 3501.5<br>3500.5                | 3650 (42)                      | 3483                             | 3456.0                          | 3451.8                          | v NH (100)                                                                                                                  |
| 3204 (9)                       | 3052                             |                                 |                                 | 3184 (12)                      | 3044                             |                                 |                                 | v <sub>as</sub> CH <sub>3</sub> (97)                                                                                        |
| 3172 (13)                      | 3018                             | 2940.0                          |                                 | 3158 (18)                      | 3014                             |                                 |                                 | v <sub>as</sub> CH <sub>3</sub> (99)                                                                                        |
| 3095 (30)                      | 3038                             | 2963.5                          |                                 | 3085 (47)                      | 2908                             |                                 |                                 | v <sub>s</sub> CH <sub>3</sub> (100)                                                                                        |
| 3021 (91)                      | 2908                             | 2855.1                          | 2843.5<br>2844.5                | 3003 (70)                      | 2885                             | 2848.0                          | 2839.7                          | v CH (99)                                                                                                                   |
| 1748 (340)                     | 1707                             | 1725.3                          | 1731.3                          | 1763 (504)                     | 1725                             |                                 | 1740.8                          | v CO (69), δ CH (14), v CN (11)                                                                                             |
| 1560 (83)                      | 1487                             | 1525.8                          | (1515)                          | 1490 (2)                       | 1452                             | 1497.7                          |                                 | δ NH (50), v CN (26), δ <sub>s</sub> CH <sub>3</sub> (10)<br>[δ <sub>as</sub> CH <sub>3</sub> (68), ρ CH <sub>3</sub> (12)] |
| 1526 (41)                      | 1480                             | 1464.0                          |                                 | 1516 (6)                       | 1497                             |                                 |                                 | δ <sub>as</sub> CH <sub>3</sub> (74)<br>δ <sub>as</sub> CH <sub>3</sub> (85)                                                |
| 1509 (21)                      | 1456                             | 1456.4                          | 1473 br                         | 1562 (14)                      | 1504                             |                                 |                                 | δ <sub>as</sub> CH <sub>3</sub> (85)<br>[δ NH (40), δ <sub>as</sub> CH <sub>3</sub> (35)]                                   |
| 1478 (20)                      | 1483                             | 1408.6                          | 1423 br                         | 1496 (13)                      | 1478                             |                                 |                                 | δ <sub>s</sub> CH <sub>3</sub> (80)                                                                                         |
| 1432 (7)                       | 1413                             | 1393.3                          | 1412 br                         | 1417 (17)                      | 1401                             |                                 |                                 | δ CH (55), δ OCN (34)                                                                                                       |
| 1242 (51)                      | 1217                             | 1204.7                          | 1205.0                          | 1314 (121)                     | 1286                             | 1292.8                          | 1285.2                          | v CN (30), v N-CH <sub>3</sub> (22), δ NH (18)<br>[v CN (45), δ NH (28)]                                                    |
| 1176 (6)                       | 1148                             | 1146.4                          | 1154.5                          | 1023 (42)                      | 1004                             | 1000.4                          | 1001.5                          | ρ CH <sub>3</sub> (64), δ NH (12)<br>[ρ CH <sub>3</sub> (35), v N-CH <sub>3</sub> (24), v CN (15)]                          |
| 1172 (0)                       | 1169                             | 1143.0                          | 1149.5                          | 1173 (1)                       | 1142                             |                                 |                                 | ρ CH <sub>3</sub> (77)                                                                                                      |
| 1032 (1)                       | 1010                             |                                 |                                 | 1043 (4)                       | 1020                             |                                 |                                 | γ CH (94)                                                                                                                   |
| 974 (19)                       | 961                              | 947.5                           | 949.7                           | 1179 (35)                      | 1145                             | 1133.3                          | 1136.0                          | v N-CH <sub>3</sub> (65), v CN (24)<br>[v N-CH <sub>3</sub> (49), ρ CH <sub>3</sub> (34)]                                   |
| 774 (5)                        | 775                              |                                 |                                 | 613 (10)                       | 604                              |                                 |                                 | δ OCN (41), δ CNC (21), ρ CH <sub>3</sub> (15)<br>[δ OCN (35), v N-CH <sub>3</sub> (19), v CN (15)]                         |
| 481 (19)                       | 482                              |                                 |                                 | 596 (115)                      | 571                              | 601.5                           |                                 | γ CN (88)<br>[γ CN (62), γ NH (23)]                                                                                         |
| 270 (11)                       | 219                              |                                 |                                 | 345 (7)                        | 343                              |                                 |                                 | δ CNC (68), δ OCN (15), δ CH (10)<br>[δ CNC (72), δ OCN (15)]                                                               |
| 209 (90)                       | 339                              |                                 |                                 | 198 (1)                        | 185                              |                                 |                                 | γ NH (87)<br>[γ NH (41), τ CH <sub>3</sub> (33), γ CN (16)]                                                                 |
| 41 (5)                         | 225                              |                                 |                                 | 92 (1)                         | 106                              |                                 |                                 | τ CH <sub>3</sub> (21), ρ CH <sub>3</sub> (24)<br>[τ CH <sub>3</sub> (55), γ CN (22), γ NH (14)]                            |

<sup>a</sup> In all calculations the MP2/6-311++G(2d,2p) method was used. <sup>b</sup> The IR calculated intensities expressed in km mol<sup>-1</sup>. <sup>c</sup> Main elements of PED (larger than 10%); the assignment obtained for *cis*-NMF is given in brackets; Abbreviations: v – bond stretching, δ – bending, deformation in plane, ρ – rocking, γ – out of plane bending, torsion, τ – twisting.

**Table S2** Selected structural parameters calculated for the NMF-Ar, NMF-N<sub>2</sub>, NMF-CO and NMF-H<sub>2</sub>O complexes<sup>a</sup>

| Property                     | I      | II     | III    | IV    |
|------------------------------|--------|--------|--------|-------|
| NMF-Ar                       |        |        |        |       |
| r(N)H...Ar)                  | 3.025  |        |        |       |
| r((C <sub>1</sub> )H...Ar)   |        | 3.270  |        |       |
| r(N...Ar)                    |        |        |        | 3.795 |
| r((C <sub>4</sub> )H...Ar)   | 3.384  |        | 3.490  | 3.253 |
| r(O...Ar)                    |        | 3.723  | 3.650  |       |
| φ(NH...Ar)                   | 140.0  |        |        |       |
| φ(C <sub>1</sub> H...Ar)     |        | 115.9  |        |       |
| φ(C <sub>4</sub> H...Ar)     | 125.7  |        | 112.8  | 127.3 |
| φ(C <sub>1</sub> O...Ar)     |        | 88.0   | 136.7  | 75.3  |
| θ(C <sub>4</sub> NH...Ar)    | 4.8    |        |        |       |
| θ(NC <sub>1</sub> H...Ar)    |        | 179.7  |        |       |
| θ(NC <sub>4</sub> H...Ar)    |        |        | 107.4  | 1.9   |
| θ(C <sub>1</sub> NH...Ar)    | 179.1  |        |        |       |
| θ(OC <sub>1</sub> H...Ar)    |        | -0.8   |        | -93.1 |
| θ(NC <sub>1</sub> O...Ar)    |        | -179.9 | -8.0   | -78.8 |
| NMF-N <sub>2</sub>           |        |        |        |       |
| r(N)H...N(N))                | 2.522  |        |        |       |
| r((C <sub>1</sub> )H...N(N)) |        | 2.860  |        |       |
| r((C <sub>4</sub> )H...N(N)) |        |        | 3.101  | 2.921 |
| r(O...N(N))                  |        | 3.621  | 3.267  | 3.320 |
| φ(NH...N(N))                 | 151.1  |        |        |       |
| φ(C <sub>1</sub> H...N(N))   |        | 111.2  |        |       |
| φ(C <sub>4</sub> H...N(N))   |        |        | 115.6  | 124.4 |
| φ(C <sub>1</sub> O...N(N))   |        | 105.1  | 135.5  | 84.8  |
| θ(C <sub>4</sub> NH...N(N))  | 0.05   |        |        |       |
| θ(NC <sub>1</sub> H...N(N))  |        | -180.0 |        |       |
| θ(NC <sub>4</sub> H...N(N))  |        |        | -103.0 | -34.1 |
| θ(C <sub>1</sub> NH...N(N))  | -179.5 |        |        |       |
| θ(OC <sub>1</sub> H...N(N))  |        | -0.4   |        |       |
| θ(NC <sub>1</sub> O...N(N))  |        | 179.8  | -0.2   | -73.6 |
| θ(C <sub>1</sub> H...NN)     |        | 0.9    |        |       |
| θ(C <sub>4</sub> H...NN)     |        |        | 86.9   |       |
| NMF-CO                       |        |        |        |       |
| r(N)H...C(O))                | 2.519  |        |        |       |
| r((C <sub>1</sub> )H...C(O)) |        | 2.922  |        |       |
| r((C <sub>4</sub> )H...C(O)) |        |        | 3.150  | 3.043 |
| r(O...C(O))                  |        | 3.125  | 3.194  | 3.275 |
| φ(NH...C(O))                 | 174.3  |        |        |       |
| φ(C <sub>1</sub> H...C(O))   |        | 106.1  |        |       |
| φ(C <sub>4</sub> H...C(O))   |        |        | 118.1  | 125.5 |
| φ(C <sub>1</sub> O...C(O))   |        | 91.9   | 138.6  | 90.5  |
| θ(C <sub>4</sub> NH...C(O))  | 0.0    |        |        |       |
| θ(NC <sub>1</sub> H...C(O))  |        | 179.9  |        |       |

|                                                         |       |        |       |       |
|---------------------------------------------------------|-------|--------|-------|-------|
| $\theta(\text{NC}_4\text{H}\cdots\text{C}(\text{O}))$   |       |        | -98.8 | -38.1 |
| $\theta(\text{C}_1\text{NH}\cdots\text{C}(\text{O}))$   | 180.0 |        |       |       |
| $\theta(\text{OC}_1\text{H}\cdots\text{C}(\text{O}))$   |       | 0.2    |       |       |
| $\theta(\text{NC}_1\text{O}\cdots\text{C}(\text{O}))$   |       | -179.8 | -2.1  | -75.0 |
| $\theta(\text{C}_1\text{H}\cdots\text{CO})$             |       | -0.6   |       |       |
| $\theta(\text{C}_4\text{H}\cdots\text{CO})$             |       |        | 83.0  | -72.4 |
| NMF-H <sub>2</sub> O                                    |       |        |       |       |
|                                                         | C     | B      | A     |       |
| $r(\text{N})\text{H}\cdots\text{O}(\text{H}_2)$         | 2.071 |        |       |       |
| $r(\text{C}_1)\text{H}\cdots\text{O}(\text{H}_2)$       |       | 2.781  |       |       |
| $r(\text{C}_4)\text{H}\cdots\text{O}(\text{H}_2)$       |       |        | 2.801 |       |
| $r(\text{O}\cdots\text{H}(\text{OH}))$                  |       |        | 1.944 |       |
| $\phi(\text{NH}\cdots\text{O}(\text{H}_2))$             | 175.6 |        |       |       |
| $\phi(\text{C}_1\text{H}\cdots\text{O}(\text{H}_2))$    |       | 101.4  |       |       |
| $\phi(\text{C}_4\text{H}\cdots\text{O}(\text{H}_2))$    |       |        | 105.5 |       |
| $\phi(\text{C}_1\text{O}\cdots\text{H}(\text{OH}))$     |       | 101.2  | 132.4 |       |
| $\theta(\text{C}_4\text{NH}\cdots\text{O}(\text{H}_2))$ | 0.0   |        |       |       |
| $\theta(\text{NC}_1\text{H}\cdots\text{O}(\text{H}_2))$ |       | 177.2  |       |       |
| $\theta(\text{NC}_4\text{H}\cdots\text{O}(\text{H}_2))$ |       |        | 100.7 |       |
| $\theta(\text{C}_1\text{NH}\cdots\text{O}(\text{H}_2))$ | 180.0 |        |       |       |
| $\theta(\text{OC}_1\text{H}\cdots\text{O}(\text{H}_2))$ |       | -2.9   |       |       |
| $\theta(\text{NC}_1\text{O}\cdots\text{H}(\text{OH}))$  |       | -177.7 | 0.0   |       |
| $\theta(\text{C}_1\text{O}\cdots\text{HO}(\text{H}))$   |       | 2.59   | 0.0   |       |

<sup>a</sup> In all calculations the MP2/6-311++G(2d,2p) method was used; the interacting atoms refer to the Figure 5; the bond distances are given in Å, the angles in degrees.

**Table S3** Wavenumbers (in  $\text{cm}^{-1}$ ) of the NMF-Ar complexes calculated by the MP2/6-311++G(2d,2p) method.

| I                      | II         | III        | IV         | Assignmt. <sup>a</sup> |
|------------------------|------------|------------|------------|------------------------|
| 3696 (60) <sup>b</sup> | 3695 (46)  | 3696 (47)  | 3694 (46)  | $\nu\text{NH}$         |
| 3204 (9)               | 3204 (9)   | 3204 (11)  | 3204 (88)  | $\nu\text{CH}_3$       |
| 3172 (13)              | 3172 (13)  | 3172 (12)  | 3173 (14)  | $\nu\text{CH}_3$       |
| 3095 (28)              | 3095 (28)  | 3095 (26)  | 3095 (28)  | $\nu\text{CH}_3$       |
| 3020 (90)              | 3022 (89)  | 3022 (95)  | 3020 (88)  | $\nu\text{CH}$         |
| 1748 (348)             | 1748 (332) | 1747 (339) | 1748 (324) | $\nu\text{C=O}$        |
| 1560 (89)              | 1560 (87)  | 1559 (86)  | 1561 (79)  | $\delta\text{NH}$      |
| 1526 (46)              | 1526 (44)  | 1526 (43)  | 1527 (39)  | $\delta\text{CH}_3$    |
| 1510 (22)              | 1509 (21)  | 1508 (15)  | 1510 (21)  | $\delta\text{CH}_3$    |
| 1477 (23)              | 1478 (21)  | 1479 (20)  | 1476 (19)  | $\delta\text{CH}_3$    |
| 1432 (8)               | 1433 (9)   | 1432 (8)   | 1432 (7)   | $\delta\text{CH}$      |
| 1242 (50)              | 1242 (55)  | 1242 (47)  | 1242 (49)  | $\nu\text{CN}$         |
| 1176 (4)               | 1176 (6)   | 1176 (5)   | 1176 (6)   | $\rho\text{CH}_3$      |
| 1172 (1)               | 1172 (0)   | 1173 (0)   | 1171 (1)   | $\rho\text{CH}_3$      |
| 1032 (1)               | 1032 (1)   | 1032 (1)   | 1032 (1)   | $\gamma\text{CH}$      |
| 975 (21)               | 975 (20)   | 975 (19)   | 975 (17)   | $\nu\text{ N-CH}_3$    |
| 774 (5)                | 774 (5)    | 774 (5)    | 774 (4)    | $\delta\text{OCN}$     |
| 485 (17)               | 482 (19)   | 478 (17)   | 483 (21)   | $\gamma\text{CN}$      |
| 271 (10)               | 270 (12)   | 268 (10)   | 271 (10)   | $\delta\text{CNC}$     |
| 213 (83)               | 209 (87)   | 202 (87)   | 213 (96)   | $\gamma\text{NH}$      |
| 43 (4)                 | 40 (5)     | 47 (3)     | 44 (9)     | $\tau\text{CH}_3$      |
| 31 (1)                 | 28 (0)     | 31 (0)     | 40 (1)     | intermolecular         |
| 25 (6)                 | 25 (6)     | 24 (6)     | 37 (0)     | intermolecular         |
| 10 (11)                | 6 (0)      | 14 (14)    | 25 (9)     | intermolecular         |

<sup>a</sup> Only the main components of PED calculated for *t*-NMF monomer are presented. Relatively weak intermolecular interaction has small effect on PED of amides [N.S. Myshakina, Z. Ahmed, S. A. Asher, J. Chem. Phys. B, Letters, 112, 2008, 11873.].

<sup>b</sup> The IR calculated intensities expressed in  $\text{km mol}^{-1}$ .



**Table S4.** Wavenumbers (in  $\text{cm}^{-1}$ ) of the NMF- $\text{N}_2$  complexes calculated by the MP2/6-311++G(2d,2p) method.

| I                       | II         | III        | IV         | Assignmt. <sup>a</sup> |
|-------------------------|------------|------------|------------|------------------------|
| 3696 (108) <sup>b</sup> | 3695 (48)  | 3696 (48)  | 3690 (45)  | vNH                    |
| 3201 (12)               | 3204 (9)   | 3205 (11)  | 3205 (4)   | vCH <sub>3</sub>       |
| 3169 (13)               | 3172 (13)  | 3174 (12)  | 3175 (15)  | vCH <sub>3</sub>       |
| 3095 (27)               | 3095 (28)  | 3097 (24)  | 3095 (31)  | vCH <sub>3</sub>       |
| 3020 (91)               | 3027 (77)  | 3023 (94)  | 3020 (88)  | vCH                    |
| 1746 (356)              | 1746 (335) | 1746 (345) | 1749 (330) | vC=O                   |
| 1560 (100)              | 1560 (89)  | 1558 (94)  | 1567 (80)  | δNH                    |
| 1528 (53)               | 1527 (45)  | 1524 (37)  | 1530 (24)  | δCH <sub>3</sub>       |
| 1507 (8)                | 1509 (19)  | 1508 (14)  | 1514 (30)  | δCH <sub>3</sub>       |
| 1479 (23)               | 1478 (22)  | 1480 (20)  | 1471 (17)  | δCH <sub>3</sub>       |
| 1431 (9)                | 1435 (12)  | 1431 (8)   | 1434 (8)   | δCH                    |
| 1247 (48)               | 1243 (55)  | 1242 (44)  | 1240 (58)  | vCN                    |
| 1176 (3)                | 1177 (6)   | 1176 (5)   | 1176 (2)   | ρCH <sub>3</sub>       |
| 1174 (0)                | 1172 (0)   | 1172 (0)   | 1170 (7)   | ρCH <sub>3</sub>       |
| 1032 (1)                | 1036 (1)   | 1033 (1)   | 1032 (1)   | γCH                    |
| 977 (19)                | 976 (21)   | 975 (18)   | 972 (17)   | v N-CH <sub>3</sub>    |
| 775 (6)                 | 774 (6)    | 774 (5)    | 773 (3)    | δOCN                   |
| 502 (19)                | 483 (19)   | 479 (17)   | 504 (30)   | γCN                    |
| 265 (9)                 | 271 (12)   | 268 (10)   | 283 (11)   | δCNC                   |
| 230 (79)                | 212 (87)   | 206 (86)   | 242 (92)   | γNH                    |
| 72 (1)                  | 69 (0)     | 68 (0)     | 76 (2)     | intermolecular         |
| 62 (0)                  | 50 (2)     | 52 (2)     | 64 (0)     | intermolecular         |
| 55 (0)                  | 41 (6)     | 47 (3)     | 45 (2)     | τCH <sub>3</sub>       |
| 24 (10)                 | 37 (3)     | 34 (4)     | 33 (10)    | intermolecular         |
| 15 (5)                  | 34 (1)     | 21 (14)    | 30 (1)     | intermolecular         |
| 13 (0)                  | 14 (3)     | 13 (0)     | 20 (2)     | intermolecular         |
| 2172 (0)                | 2171 (0)   | 2170 (0)   | 2168 (0)   | vNN                    |

<sup>a</sup> See footnote at Table S3. <sup>b</sup> The IR calculated intensities expressed in  $\text{km mol}^{-1}$ .

**Table S5.** Wavenumbers (in  $\text{cm}^{-1}$ ) of the NMF-CO complexes calculated by the MP2/6-311++G(2d,2p) method.

| I                       | II         | III        | IV         | Assignmt. <sup>a</sup> |
|-------------------------|------------|------------|------------|------------------------|
| 3677 (165) <sup>b</sup> | 3696 (48)  | 3695 (48)  | 3690 (46)  | $\nu\text{NH}$         |
| 3200 (12)               | 3204 (9)   | 3205 (10)  | 3204 (5)   | $\nu\text{CH}_3$       |
| 3168 (14)               | 3172 (13)  | 3176 (12)  | 3176 (14)  | $\nu\text{CH}_3$       |
| 3094 (28)               | 3096 (28)  | 3097 (24)  | 3096 (28)  | $\nu\text{CH}_3$       |
| 3018 (93)               | 3033 (69)  | 3024 (95)  | 3020 (87)  | $\nu\text{CH}$         |
| 1745 (366)              | 1743 (346) | 1745 (354) | 1747 (332) | $\nu\text{C=O}$        |
| 1566 (100)              | 1560 (91)  | 1558 (97)  | 1567 (82)  | $\delta\text{NH}$      |
| 1532 (26)               | 1527 (46)  | 1524 (33)  | 1530 (27)  | $\delta\text{CH}_3$    |
| 1507 (8)                | 1509 (17)  | 1508 (16)  | 1513 (25)  | $\delta\text{CH}_3$    |
| 1479 (17)               | 1478 (23)  | 1480 (20)  | 1472 (17)  | $\delta\text{CH}_3$    |
| 1430 (10)               | 1434 (14)  | 1432 (9)   | 1434 (9)   | $\delta\text{CH}$      |
| 1252 (58)               | 1244 (55)  | 1243 (44)  | 1241 (54)  | $\nu\text{CN}$         |
| 1180 (4)                | 1177 (6)   | 1177 (4)   | 1177 (3)   | $\rho\text{CH}_3$      |
| 1174 (0)                | 1173 (0)   | 1170 (0)   | 1179 (6)   | $\rho\text{CH}_3$      |
| 1032 (1)                | 1039 (1)   | 1033 (1)   | 1033 (1)   | $\gamma\text{CH}$      |
| 978 (17)                | 976 (21)   | 974 (18)   | 974 (17)   | $\nu\text{N-CH}_3$     |
| 775 (6)                 | 774 (5)    | 774 (5)    | 773 (4)    | $\delta\text{OCN}$     |
| 528 (23)                | 485 (18)   | 482 (18)   | 504 (30)   | $\gamma\text{CN}$      |
| 265 (10)                | 272 (14)   | 268 (10)   | 281 (11)   | $\delta\text{CNC}$     |
| 260 (79)                | 215 (86)   | 212 (86)   | 246 (92)   | $\gamma\text{NH}$      |
| 92 (0)                  | 107 (0)    | 95 (0)     | 92 (1)     | intermolecular         |
| 82 (0)                  | 64 (1)     | 60 (2)     | 71 (1)     | intermolecular         |
| 64 (1)                  | 50 (3)     | 51 (4)     | 29 (2)     | intermolecular         |
| 39 (6)                  | 43 (6)     | 39 (4)     | 40 (0)     | $\tau\text{CH}_3$      |
| 19 (0)                  | 33 (4)     | 25 (15)    | 31 (9)     | intermolecular         |
| 12 (4)                  | 19 (4)     | 14 (0)     | 26 (8)     | intermolecular         |
| 2124 (35)               | 2117 (34)  | 2118 (32)  | 2117       | $\nu\text{CO}$         |

<sup>a</sup> See footnote at Table S3. <sup>b</sup> The IR calculated intensities expressed in  $\text{km mol}^{-1}$ .

**Table S6** Wavenumbers (in  $\text{cm}^{-1}$ ) of the  $(\text{CO})_\alpha$ -NMF- $(\text{CO})_\beta$  complexes calculated by the MP2/6-311++G(2d,2p) method (without CP-correction).

| I                      | II         | III        | IV         | Assignmt. <sup>a</sup>  |
|------------------------|------------|------------|------------|-------------------------|
| 3693 (51) <sup>b</sup> | 3672 (201) | 3672 (197) | 3690 (48)  | $\nu\text{NH}$          |
| 3205 (9)               | 3200 (15)  | 3200 (12)  | 3203 (7)   | $\nu\text{CH}_3$        |
| 3175 (12)              | 3172 (11)  | 3167 (13)  | 3177 (12)  | $\nu\text{CH}_3$        |
| 3096 (25)              | 3095 (25)  | 3093 (29)  | 3096 (27)  | $\nu\text{CH}_3$        |
| 3036 (71)              | 3021 (97)  | 3032 (70)  | 3033 (65)  | $\nu\text{CH}$          |
| 1739 (371)             | 1741 (386) | 1739 (378) | 1740 (338) | $\nu\text{C=O}$         |
| 1559 (103)             | 1568 (114) | 1570 (109) | 1564 (85)  | $\delta\text{NH}$       |
| 1525 (30)              | 1528 (11)  | 1534 (18)  | 1529 (34)  | $\delta\text{CH}_3$     |
| 1509 (20)              | 1507 (10)  | 1507 (8)   | 1511 (20)  | $\delta\text{CH}_3$     |
| 1479 (21)              | 1481 (15)  | 1480 (17)  | 1473 (18)  | $\delta\text{CH}_3$     |
| 1432 (16)              | 1430 (12)  | 1432 (19)  | 1434 (14)  | $\delta\text{CH}$       |
| 1243 (49)              | 1254 (54)  | 1255 (67)  | 1244 (53)  | $\nu\text{CN}$          |
| 1178 (4)               | 1182 (3)   | 1183 (4)   | 1178 (3)   | $\rho\text{CH}_3$       |
| 1171 (1)               | 1171 (0)   | 1174 (0)   | 1171 (4)   | $\rho\text{CH}_3$       |
| 1039 (1)               | 1033 (1)   | 1041 (0)   | 1037 (1)   | $\gamma\text{CH}$       |
| 976 (21)               | 979 (17)   | 981 (19)   | 976 (17)   | $\nu\text{N-CH}_3$      |
| 775 (6)                | 776 (6)    | 775 (8)    | 774 (5)    | $\delta\text{OCN}$      |
| 492 (21)               | 564 (31)   | 564 (29)   | 502 (25)   | $\gamma\text{CN}$       |
| 277 (15)               | 267 (10)   | 271 (15)   | 280 (13)   | $\delta\text{CNC}$      |
| 230 (84)               | 287 (60)   | 290 (59)   | 246 (93)   | $\gamma\text{NH}$       |
| 122 (1)                | 105 (0)    | 117 (0)    | 112 (0)    | intermolecular          |
| 104 (0)                | 102 (0)    | 105 (2)    | 100 (1)    | intermolecular          |
| 75 (2)                 | 96 (1)     | 98 (1)     | 75 (3)     | intermolecular          |
| 66 (4)                 | 81 (0)     | 78 (0)     | 73 (1)     | intermolecular          |
| 63 (2)                 | 61 (1)     | 70 (1)     | 59 (0)     | intermolecular          |
| 57 (3)                 | 57 (2)     | 56 (2)     | 55 (6)     | intermolecular          |
| 43 (2)                 | 48 (4)     | 44 (2)     | 46 (4)     | $\tau\text{CH}_3$       |
| 36 (8)                 | 47 (4)     | 50 (5)     | 42 (3)     | intermolecular          |
| 21 (1)                 | 24 (0)     | 27 (1)     | 35 (0)     | intermolecular          |
| 19 (1)                 | 11 (0)     | 22 (1)     | 32 (4)     | intermolecular          |
| 8 (1)                  | 10 (0)     | 8 (0)      | 22 (1)     | intermolecular          |
| 2115 (19)              | 2116 (32)  | 2116 (35)  | 2113 (48)  | $\nu(\text{CO})_\alpha$ |
| 2114 (43)              | 2125 (35)  | 2125 (34)  | 2114 (13)  | $\nu(\text{CO})_\beta$  |

<sup>a</sup> See footnote at Table S3. <sup>b</sup> The IR calculated intensities expressed in  $\text{km mol}^{-1}$ .

**Table S7.** Wavenumbers (in  $\text{cm}^{-1}$ ) of the NMF-H<sub>2</sub>O complexes calculated by the MP2/6-311++G(2d,2p) method.

| I                       | II         | III        | Assignmt. <sup>a</sup>     |
|-------------------------|------------|------------|----------------------------|
| 3630 (365) <sup>b</sup> | 3696 (48)  | 3693 (138) | $\nu\text{NH}$             |
| 3199 (12)               | 3208 (9)   | 3211 (8)   | $\nu\text{CH}_3$           |
| 3162 (16)               | 3176 (11)  | 3187 (5)   | $\nu\text{CH}_3$           |
| 3091 (31)               | 3100 (24)  | 3105 (15)  | $\nu\text{CH}_3$           |
| 3017 (97)               | 3061 (36)  | 3047 (84)  | $\nu\text{CH}$             |
| 1741 (368)              | 1735 (328) | 1741 (380) | $\nu\text{C=O}$            |
| 1575 (109)              | 1563 (101) | 1563 (109) | $\delta\text{NH}$          |
| 1535 (9)                | 1530 (10)  | 1526 (19)  | $\delta\text{CH}_3$        |
| 1508 (8)                | 1509 (11)  | 1513 (12)  | $\delta\text{CH}_3$        |
| 1478 (14)               | 1481 (24)  | 1486 (19)  | $\delta\text{CH}_3$        |
| 1428 (13)               | 1439 (26)  | 1436 (16)  | $\delta\text{CH}$          |
| 1260 (60)               | 1252 (42)  | 1252 (36)  | $\nu\text{CN}$             |
| 1184 (2)                | 1182 (2)   | 1186 (2)   | $\rho\text{CH}_3$          |
| 1174 (0)                | 1174 (0)   | 1165 (0)   | $\rho\text{CH}_3$          |
| 1034 (1)                | 1046 (1)   | 1036 (1)   | $\gamma\text{CH}$          |
| 984 (12)                | 981 (14)   | 972 (14)   | $\nu\text{ N-CH}_3$        |
| 777 (7)                 | 779 (6)    | 776 (4)    | $\delta\text{OCN}$         |
| 98 (9)                  | 585 (110)  | 583 (72)   | intermolecular             |
| 643 (67)                | 496 (23)   | 500 (43)   | $\gamma\text{CN}$          |
| 162 (14)                | 389 (145)  | 369 (126)  | intermolecular             |
| 267 (12)                | 290 (43)   | 275 (20)   | $\delta\text{CNC}$         |
| 324 (82)                | 246 (80)   | 251 (75)   | $\gamma\text{NH}$          |
| 67 (0)                  | 151 (2)    | 161 (9)    | intermolecular             |
| 124 (62)                | 69 (110)   | 131 (129)  | intermolecular             |
| 119 (190)               | 52 (42)    | 89 (12)    | intermolecular             |
| 41 (0)                  | 36 (93)    | 79 (1)     | $\tau\text{CH}_3$          |
| 32 (2)                  | 26 (2)     | 26 (6)     | intermolecular             |
| 3975 (95)               | 3950 (110) | 3947 (110) | $\nu_3\text{ H}_2\text{O}$ |
| 3858 (21)               | 3705 (386) | 3727 (353) | $\nu_1\text{ H}_2\text{O}$ |
| 1664 (68)               | 1689 (126) | 1690 (84)  | $\nu_2\text{ H}_2\text{O}$ |

<sup>a</sup> See footnote at Table S3. <sup>b</sup> The IR calculated intensities expressed in  $\text{km mol}^{-1}$ .

**Table S8.** AIM atomic properties computed at MP2/6-311++G(2d,2p) level for NMF-Ar complexes (in atomic units)

| BCP between<br>X and Y | $\rho$ | $\nabla^2\rho$ | $\varepsilon$ | $H$     | $DI(X,Y)$ |
|------------------------|--------|----------------|---------------|---------|-----------|
| <b>NMF-Ar I</b>        |        |                |               |         |           |
| C1 - N2                | 0.3236 | -1.0662        | 0.1744        | -0.4745 | 0.9319    |
| C1 - O3                | 0.4060 | -0.5432        | 0.1197        | -0.7373 | 1.1428    |
| N2 - C4                | 0.2579 | -0.7057        | 0.0399        | -0.3019 | 0.8293    |
| N2 - H6                | 0.3485 | -1.8519        | 0.0510        | -0.5305 | 0.7218    |
| C1 - H5                | 0.2865 | -1.0806        | 0.0286        | -0.3076 | 0.7755    |
| C4 - H7                | 0.2878 | -1.0750        | 0.0325        | -0.3144 | 0.8255    |
| C4 - H8                | 0.2897 | -1.0906        | 0.0288        | -0.3173 | 0.8193    |
| C4 - H9                | 0.2884 | -1.0805        | 0.0300        | -0.3170 | 0.8336    |
| H6 - Ar10              | 0.0034 | 0.0139         | 0.0203        | 0.0008  | 0.0162    |
| H9 - Ar10              | 0.0021 | 0.0084         | 0.4902        | 0.0005  | 0.0113    |
| <b>NMF-Ar II</b>       |        |                |               |         |           |
| C1 - N2                | 0.3237 | -1.0662        | 0.1741        | -0.4748 | 0.9319    |
| C1 - O3                | 0.4061 | -0.5418        | 0.1189        | -0.7374 | 1.1415    |
| N2 - C4                | 0.2578 | -0.7054        | 0.0408        | -0.3018 | 0.8297    |
| N2 - H6                | 0.3485 | -1.8495        | 0.0512        | -0.5299 | 0.7287    |
| C1 - H5                | 0.2865 | -1.0798        | 0.0286        | -0.3074 | 0.7726    |
| C4 - H7                | 0.2897 | -1.0905        | 0.0290        | -0.3174 | 0.8196    |
| C4 - H8                | 0.2880 | -1.0763        | 0.0323        | -0.3146 | 0.8253    |
| C4 - H9                | 0.2884 | -1.0809        | 0.0300        | -0.3171 | 0.8368    |
| O3 - Ar10              | 0.0025 | 0.0109         | 0.1751        | 0.0007  | 0.0196    |
| H5 - Ar10              | 0.0024 | 0.0103         | 0.2440        | 0.0007  | 0.0130    |
| <b>NMF-Ar III</b>      |        |                |               |         |           |
| C1 - N2                | 0.3239 | -1.0673        | 0.1744        | -0.4756 | 0.9319    |
| C1 - O3                | 0.4060 | -0.5435        | 0.1195        | -0.7371 | 1.1421    |
| N2 - C4                | 0.2577 | -0.7052        | 0.0417        | -0.3017 | 0.8291    |
| N2 - H6                | 0.3485 | -1.8505        | 0.0513        | -0.5302 | 0.7284    |
| C1 - H5                | 0.2866 | -1.0811        | 0.0287        | -0.3077 | 0.7756    |
| C4 - H7                | 0.2894 | -1.0877        | 0.0295        | -0.3168 | 0.8185    |
| C4 - H8                | 0.2882 | -1.0778        | 0.0318        | -0.3149 | 0.8225    |
| C4 - H9                | 0.2884 | -1.0810        | 0.0296        | -0.3171 | 0.8364    |
| O3 - Ar10              | 0.0028 | 0.0112         | 0.0159        | 0.0007  | 0.0215    |
| H7 - Ar10              | 0.0019 | 0.0076         | 1.3292        | 0.0005  | 0.0075    |
| <b>NMF-Ar IV</b>       |        |                |               |         |           |
| C1 - N2                | 0.3235 | -1.0654        | 0.1745        | -0.4743 | 0.9293    |
| C1 - O3                | 0.4061 | -0.5414        | 0.1200        | -0.7374 | 1.1406    |
| N2 - C4                | 0.2578 | -0.7057        | 0.0402        | -0.3021 | 0.8290    |
| N2 - H6                | 0.3484 | -1.8483        | 0.0511        | -0.5297 | 0.7287    |
| C1 - H5                | 0.2865 | -1.0806        | 0.0286        | -0.3076 | 0.7749    |
| C4 - H7                | 0.2898 | -1.0913        | 0.0287        | -0.3175 | 0.8189    |
| C4 - H8                | 0.2878 | -1.0745        | 0.0325        | -0.3143 | 0.8223    |
| C4 - H9                | 0.2883 | -1.0803        | 0.0303        | -0.3170 | 0.8365    |
| N2 - Ar10              | 0.0029 | 0.0110         | 0.8907        | 0.0006  | 0.0166    |
| H8 - Ar10              | 0.0026 | 0.0105         | 0.3023        | 0.0006  | 0.0135    |

**Table S9.** AIM atomic properties computed at MP2/6-311++G(2d,2p) level for NMF-N<sub>2</sub> complexes (in au)

| BCP between<br>X and Y       | $\rho$ | $\nabla^2\rho$ | $\varepsilon$ | $H$     | $DI(X,Y)$ |
|------------------------------|--------|----------------|---------------|---------|-----------|
| <b>NMF-N<sub>2</sub> I</b>   |        |                |               |         |           |
| C1 - N2                      | 0.3248 | -1.0717        | 0.1755        | -0.4783 | 0.9343    |
| C1 - O3                      | 0.4054 | -0.5467        | 0.1197        | -0.7358 | 1.1404    |
| N2 - C4                      | 0.2585 | -0.7081        | 0.0423        | -0.3019 | 0.8311    |
| N2 - H6                      | 0.3485 | -1.8789        | 0.0503        | -0.5364 | 0.7067    |
| C1 - H5                      | 0.2864 | -1.0797        | 0.0288        | -0.3074 | 0.7757    |
| C4 - H7                      | 0.2886 | -1.0815        | 0.0304        | -0.3156 | 0.8225    |
| C4 - H8                      | 0.2886 | -1.0815        | 0.0304        | -0.3156 | 0.8225    |
| C4 - H9                      | 0.2881 | -1.0789        | 0.0292        | -0.3167 | 0.8351    |
| H6 - N10                     | 0.0072 | 0.0270         | 0.0519        | 0.0013  | 0.0273    |
| N10 - N11                    | 0.6595 | -2.4978        | 0.0004        | -1.1834 | 2.2728    |
| <b>NMF-N<sub>2</sub> II</b>  |        |                |               |         |           |
| C1 - N2                      | 0.3240 | -1.0673        | 0.1730        | -0.4762 | 0.9331    |
| C1 - O3                      | 0.4053 | -0.5436        | 0.1165        | -0.7355 | 1.1389    |
| N2 - C4                      | 0.2578 | -0.7055        | 0.0410        | -0.3018 | 0.8292    |
| N2 - H6                      | 0.3485 | -1.8508        | 0.0511        | -0.5302 | 0.7283    |
| C1 - H5                      | 0.2870 | -1.0834        | 0.0285        | -0.3081 | 0.7706    |
| C4 - H7                      | 0.2897 | -1.0899        | 0.0291        | -0.3172 | 0.8198    |
| C4 - H8                      | 0.2881 | -1.0768        | 0.0321        | -0.3147 | 0.8250    |
| C4 - H9                      | 0.2884 | -1.0811        | 0.0299        | -0.3172 | 0.8365    |
| O3 - N11                     | 0.0049 | 0.0183         | 0.3113        | 0.0008  | 0.0260    |
| H5 - N11                     | 0.0043 | 0.0169         | 0.4639        | 0.0009  | 0.0168    |
| N10 - N11                    | 0.6596 | -2.5002        | 0.0016        | -1.1837 | 2.2688    |
| <b>NMF-N<sub>2</sub> III</b> |        |                |               |         |           |
| C1 - N2                      | 0.3245 | -1.0701        | 0.1753        | -0.4775 | 0.9338    |
| C1 - O3                      | 0.4054 | -0.5460        | 0.1184        | -0.7357 | 1.1387    |
| N2 - C4                      | 0.2573 | -0.7037        | 0.0414        | -0.3016 | 0.8282    |
| N2 - H6                      | 0.3485 | -1.8514        | 0.0511        | -0.5303 | 0.7281    |
| C1 - H5                      | 0.2867 | -1.0820        | 0.0287        | -0.3079 | 0.7757    |
| C4 - H7                      | 0.2883 | -1.0787        | 0.0319        | -0.3150 | 0.8221    |
| C4 - H8                      | 0.2896 | -1.0890        | 0.0298        | -0.3170 | 0.8171    |
| C4 - H9                      | 0.2884 | -1.0811        | 0.0297        | -0.3172 | 0.8366    |
| O3 - N10                     | 0.0046 | 0.0167         | 0.4513        | 0.0007  | 0.0225    |
| H8 - N10                     | 0.0029 | 0.0106         | 0.2881        | 0.0006  | 0.0100    |
| N10 - N11                    | 0.6595 | -2.4997        | 0.0021        | -1.1834 | 2.2675    |
| <b>NMF-N<sub>2</sub> IV</b>  |        |                |               |         |           |
| C1 - N2                      | 0.3230 | -1.0620        | 0.1763        | -0.4722 | 0.9325    |
| C1 - O3                      | 0.4058 | -0.5431        | 0.1183        | -0.7366 | 1.1387    |
| N2 - C4                      | 0.2577 | -0.7047        | 0.0331        | -0.3029 | 0.8287    |
| N2 - H6                      | 0.3484 | -1.8452        | 0.0500        | -0.5288 | 0.7294    |
| C1 - H5                      | 0.2866 | -1.0808        | 0.0285        | -0.3077 | 0.7747    |
| C4 - H7                      | 0.2904 | -1.0961        | 0.0272        | -0.3183 | 0.8153    |
| C4 - H8                      | 0.2877 | -1.0730        | 0.0342        | -0.3142 | 0.8235    |
| C4 - H9                      | 0.2881 | -1.0778        | 0.0325        | -0.3164 | 0.8362    |
| O3 - N10                     | 0.0042 | 0.0158         | 0.5168        | 0.0007  | 0.0205    |
| H8 - N10                     | 0.0039 | 0.0136         | 0.1016        | 0.0006  | 0.0162    |
| N10 - N11                    | 0.6593 | -2.4986        | 0.0015        | -1.1826 | 2.2670    |

**Table S10.** AIM atomic properties computed at MP2/6-311++G(2d,2p) level for NMF-CO complexes (in au)

| BCP between<br>X and Y | $\rho$ | $\nabla^2\rho$ | $\epsilon$ | $H$     | $DI(X,Y)$ |
|------------------------|--------|----------------|------------|---------|-----------|
| <b>NMF-CO I</b>        |        |                |            |         |           |
| C1 - N2                | 0.3255 | -1.0756        | 0.1768     | -0.4796 | 0.9381    |
| C1 - O3                | 0.4049 | -0.5493        | 0.1190     | -0.7343 | 1.1405    |
| N2 - C4                | 0.2588 | -0.7090        | 0.0424     | -0.3017 | 0.8322    |
| N2 - H6                | 0.3475 | -1.8913        | 0.0494     | -0.5387 | 0.6947    |
| C1 - H5                | 0.2863 | -1.0786        | 0.0289     | -0.3073 | 0.7756    |
| C4 - H7                | 0.2885 | -1.0807        | 0.0303     | -0.3154 | 0.8226    |
| C4 - H8                | 0.2885 | -1.0807        | 0.0303     | -0.3154 | 0.8226    |
| C4 - H9                | 0.2881 | -1.0788        | 0.0291     | -0.3167 | 0.8362    |
| H6 - C10               | 0.0089 | 0.0291         | 0.0611     | 0.0014  | 0.0425    |
| C10 - O11              | 0.4841 | 0.3922         | 0.0000     | -0.9278 | 1.5457    |
| <b>NMF-CO II</b>       |        |                |            |         |           |
| C1 - N2                | 0.3244 | -1.0686        | 0.1721     | -0.4779 | 0.9336    |
| C1 - O3                | 0.4045 | -0.5461        | 0.1147     | -0.7335 | 1.1344    |
| N2 - C4                | 0.2578 | -0.7060        | 0.0414     | -0.3020 | 0.8294    |
| N2 - H6                | 0.3485 | -1.8524        | 0.0510     | -0.5305 | 0.7279    |
| C1 - H5                | 0.2875 | -1.0876        | 0.0284     | -0.3089 | 0.7702    |
| C4 - H7                | 0.2882 | -1.0775        | 0.0320     | -0.3149 | 0.8247    |
| C4 - H8                | 0.2896 | -1.0892        | 0.0293     | -0.3171 | 0.8201    |
| C4 - H9                | 0.2884 | -1.0812        | 0.0298     | -0.3172 | 0.8366    |
| O3 - C10               | 0.0069 | 0.0229         | 0.1680     | 0.0009  | 0.0370    |
| C10 - O11              | 0.4826 | 0.3703         | 0.0012     | -0.9246 | 1.5304    |
| <b>NMF-CO III</b>      |        |                |            |         |           |
| C1 - N2                | 0.3250 | -1.0722        | 0.1762     | -0.4786 | 0.9359    |
| C1 - O3                | 0.4050 | -0.5473        | 0.1179     | -0.7346 | 1.1373    |
| N2 - C4                | 0.2570 | -0.7023        | 0.0407     | -0.3016 | 0.8275    |
| N2 - H6                | 0.3485 | -1.8513        | 0.0509     | -0.5303 | 0.7282    |
| C1 - H5                | 0.2868 | -1.0826        | 0.0287     | -0.3080 | 0.7759    |
| C4 - H7                | 0.2883 | -1.0783        | 0.0322     | -0.3150 | 0.8224    |
| C4 - H8                | 0.2899 | -1.0919        | 0.0296     | -0.3176 | 0.8162    |
| C4 - H9                | 0.2884 | -1.0808        | 0.0300     | -0.3171 | 0.8366    |
| O3 - C10               | 0.0054 | 0.0190         | 0.4466     | 0.0008  | 0.0262    |
| H8 - C10               | 0.0032 | 0.0106         | 0.1429     | 0.0006  | 0.0137    |
| C10 - O11              | 0.4828 | 0.3736         | 0.0020     | -0.9248 | 1.5329    |
| <b>NMF-CO IV</b>       |        |                |            |         |           |
| C1 - N2                | 0.3238 | -1.0664        | 0.1764     | -0.4743 | 0.9345    |
| C1 - O3                | 0.4053 | -0.5476        | 0.1171     | -0.7353 | 1.1362    |
| N2 - C4                | 0.2575 | -0.7040        | 0.0347     | -0.3026 | 0.8285    |
| N2 - H6                | 0.3484 | -1.8460        | 0.0499     | -0.5290 | 0.7290    |
| C1 - H5                | 0.2866 | -1.0814        | 0.0285     | -0.3078 | 0.7749    |
| C4 - H7                | 0.2902 | -1.0948        | 0.0276     | -0.3181 | 0.8168    |
| C4 - H8                | 0.2880 | -1.0756        | 0.0336     | -0.3146 | 0.8225    |
| C4 - H9                | 0.2881 | -1.0780        | 0.0322     | -0.3164 | 0.8363    |
| O3 - C10               | 0.0048 | 0.0167         | 0.2965     | 0.0008  | 0.0247    |
| H8 - C10               | 0.0038 | 0.0119         | 0.0851     | 0.0006  | 0.0192    |
| C10 - O11              | 0.4829 | 0.3752         | 0.0017     | -0.9251 | 1.5353    |

**Table S11.** AIM atomic properties computed at MP2/6-311++G(2d,2p) level for NMF-H<sub>2</sub>O complexes (in atomic units)

| BCP between<br>X and Y       | $\rho$ | $\nabla^2\rho$ | $\epsilon$ | $H$     | $DI(X,Y)$ |
|------------------------------|--------|----------------|------------|---------|-----------|
| <b>NMF-H<sub>2</sub>O A</b>  |        |                |            |         |           |
| C1 - N2                      | 0.3302 | -1.0955        | 0.1850     | -0.4932 | 0.9543    |
| C1 - O3                      | 0.3997 | -0.5514        | 0.1130     | -0.7216 | 1.1129    |
| N2 - C4                      | 0.2541 | -0.6909        | 0.0373     | -0.3008 | 0.8218    |
| N2 - H6                      | 0.3487 | -1.8626        | 0.0491     | -0.5324 | 0.7247    |
| C1 - H5                      | 0.2886 | -1.0972        | 0.0288     | -0.3113 | 0.7763    |
| C4 - H7                      | 0.2900 | -1.0917        | 0.0323     | -0.3174 | 0.8172    |
| C4 - H8                      | 0.2887 | -1.0836        | 0.0309     | -0.3177 | 0.8370    |
| C4 - H9                      | 0.2900 | -1.0917        | 0.0323     | -0.3174 | 0.8172    |
| C4 - O10                     | 0.0057 | 0.0262         | 15.1871    | 0.0013  | 0.0212    |
| O3 - H11                     | 0.0233 | 0.0819         | 0.0267     | 0.0010  | 0.0641    |
| O10 - H11                    | 0.3577 | -2.6930        | 0.0218     | -0.7535 | 0.5014    |
| O10 - H12                    | 0.3717 | -2.7090        | 0.0228     | -0.7667 | 0.6177    |
| <b>NMF-H<sub>2</sub>O B</b>  |        |                |            |         |           |
| C1 - N2                      | 0.3294 | -1.0918        | 0.1761     | -0.4930 | 0.9467    |
| C1 - O3                      | 0.3994 | -0.5638        | 0.1104     | -0.7204 | 1.1121    |
| N2 - C4                      | 0.2568 | -0.7034        | 0.0409     | -0.3023 | 0.8262    |
| N2 - H6                      | 0.3487 | -1.8690        | 0.0495     | -0.5338 | 0.7231    |
| C1 - H5                      | 0.2898 | -1.1070        | 0.0269     | -0.3128 | 0.7709    |
| C4 - H7                      | 0.2893 | -1.0865        | 0.0307     | -0.3166 | 0.8220    |
| C4 - H8                      | 0.2890 | -1.0846        | 0.0311     | -0.3162 | 0.8227    |
| C4 - H9                      | 0.2889 | -1.0848        | 0.0296     | -0.3179 | 0.8366    |
| O3 - H11                     | 0.0252 | 0.0860         | 0.0330     | 0.0006  | 0.0674    |
| O10 - H11                    | 0.3569 | -2.6800        | 0.0218     | -0.7509 | 0.5034    |
| O10 - H12                    | 0.3718 | -2.7111        | 0.0227     | -0.7673 | 0.6185    |
| <b>NMF-H<sub>2</sub>O C</b>  |        |                |            |         |           |
| C1 - N2                      | 0.3279 | -1.0874        | 0.1810     | -0.4846 | 0.9475    |
| C1 - O3                      | 0.4031 | -0.5580        | 0.1173     | -0.7298 | 1.1346    |
| N2 - C4                      | 0.2599 | -0.7118        | 0.0415     | -0.3012 | 0.8350    |
| N2 - H6                      | 0.3447 | -1.9366        | 0.0464     | -0.5472 | 0.6571    |
| C1 - H5                      | 0.2861 | -1.0772        | 0.0293     | -0.3071 | 0.7757    |
| C4 - H7                      | 0.2881 | -1.0767        | 0.0300     | -0.3147 | 0.8230    |
| C4 - H8                      | 0.2881 | -1.0767        | 0.0301     | -0.3147 | 0.8230    |
| C4 - H9                      | 0.2883 | -1.0798        | 0.0286     | -0.3169 | 0.8360    |
| H6 - O10                     | 0.0176 | 0.0653         | 0.0470     | 0.0016  | 0.0586    |
| O10 - H11                    | 0.3693 | -2.7423        | 0.0240     | -0.7704 | 0.5887    |
| O10 - H12                    | 0.3693 | -2.7423        | 0.0240     | -0.7704 | 0.5887    |
| <b>NMF-H<sub>2</sub>O TS</b> |        |                |            |         |           |
| C1 - N2                      | 0.3295 | -1.0919        | 0.1806     | -0.4925 | 0.9486    |
| C1 - O3                      | 0.4010 | -0.5602        | 0.1077     | -0.7246 | 1.1110    |
| N2 - C4                      | 0.2561 | -0.6997        | 0.0404     | -0.3018 | 0.8243    |
| N2 - H6                      | 0.3485 | -1.8658        | 0.0491     | -0.5330 | 0.7236    |
| C1 - H5                      | 0.2885 | -1.0968        | 0.0276     | -0.3110 | 0.7761    |
| C4 - H7                      | 0.2892 | -1.0861        | 0.0309     | -0.3162 | 0.8216    |
| C4 - H8                      | 0.2889 | -1.0851        | 0.0300     | -0.3179 | 0.8364    |
| C4 - H9                      | 0.2894 | -1.0880        | 0.0308     | -0.3169 | 0.8224    |
| O3 - H11                     | 0.0194 | 0.0752         | 0.0657     | 0.0018  | 0.0559    |
| O10 - H11                    | 0.3615 | -2.7132        | 0.0223     | -0.7598 | 0.5201    |
| O10 - H12                    | 0.3718 | -2.7096        | 0.0233     | -0.7669 | 0.6202    |



**Table S12.** Changes of AIM atomic properties computed at MP2/6-311++G(2d,2p) level. All data reported in atomic units.

| Complex                       | B    | H   | $\Delta q(H)^a$ | $\Delta E(H)^a$ | $\Delta M(H)^a$ | $\Delta V(H)^a$ | $\Delta r_B^a$ | $\Delta r_H^a$ |
|-------------------------------|------|-----|-----------------|-----------------|-----------------|-----------------|----------------|----------------|
| <b>I NMF-Ar</b>               | Ar10 | H6  | 0.001           | 0.000           | -0.003          | 1.262           | 0.235          | 0.189          |
|                               |      | H9  | 0.000           | -0.001          | -0.003          | 1.344           | 0.021          | 0.023          |
| <b>II NMF-Ar</b>              | Ar10 | H5  | 0.000           | 0.000           | -0.001          | 1.410           | 0.112          | 0.077          |
| <b>III NMF-Ar</b>             | Ar10 | H7  | -0.008          | -0.004          | 0.001           | 2.132           | -0.026         | -0.009         |
| <b>IV NMF-Ar</b>              | Ar10 | H8  | 0.002           | 0.000           | -0.003          | 0.985           | 0.127          | 0.112          |
| <b>I NMF-N<sub>2</sub></b>    | N10  | H6  | 0.013           | 0.004           | -0.013          | -1.478          | 0.580          | 0.507          |
|                               |      | H5  | 0.006           | 0.002           | -0.003          | -0.104          | 0.370          | 0.332          |
| <b>III NMF-N<sub>2</sub></b>  | N10  | H8  | 0.022           | 0.007           | -0.006          | -1.557          | 0.168          | 0.203          |
| <b>IV NMF-N<sub>2</sub></b>   | N10  | H8  | 0.001           | -0.001          | -0.006          | 0.061           | 0.304          | 0.302          |
| <b>I NMF-CO</b>               | C10  | H6  | 0.017           | 0.008           | -0.014          | -1.425          | 0.770          | 0.570          |
|                               |      | H8  | 0.024           | 0.009           | -0.006          | -1.605          | 0.283          | 0.227          |
| <b>IV NMF-CO</b>              | C10  | H8  | 0.003           | 0.000           | -0.005          | 0.440           | 0.360          | 0.269          |
| <b>I NMF-H<sub>2</sub>O</b>   | O10  | H6  | 0.054           | 0.023           | -0.039          | -7.515          | 0.983          | 0.883          |
|                               |      | H11 | 0.045           | 0.027           | -0.035          | -7.714          | 1.158          | 0.953          |
| <b>III NMF-H<sub>2</sub>O</b> | O3   | H11 | 0.048           | 0.029           | -0.038          | -8.045          | 1.134          | 0.932          |

<sup>a</sup>

$$\Delta q(H) = q(H)_{\text{complex}} - q(H)_{\text{monomer}}; \quad \Delta E(H) = E(H)_{\text{complex}} - E(H)_{\text{monomer}}; \quad \Delta M(H) = M(H)_{\text{complex}} - M(H)_{\text{monomer}}$$

$$\Delta V(H) = V(H)_{\text{complex}} - V(H)_{\text{monomer}}; \quad \Delta r_H = r_{\text{monomer}}^H - r_{\text{complex}}^H; \quad \Delta r_B = r_{\text{monomer}}^B - r_{\text{complex}}^B$$

The above table presents the values of the four Koch' and Popelier' criteria ( $\Delta q(H)$ ,  $\Delta E(H)$ ,  $\Delta M(H)$ ,  $\Delta V(H)$ ) for the hydrogen bonding interaction:

- loss of the hydrogen atom's charge ( $\Delta q(H) = q(H)_{\text{complex}} - q(H)_{\text{monomer}}$ ),
- energetic destabilization of the hydrogen atom ( $\Delta E(H) = E(H)_{\text{complex}} - E(H)_{\text{monomer}}$ ),
- decrease of the hydrogen atom's dipolar polarization ( $\Delta M(H) = M(H)_{\text{complex}} - M(H)_{\text{monomer}}$ ),
- decrease of the volume of the hydrogen atom ( $\Delta V(H) = V(H)_{\text{complex}} - V(H)_{\text{monomer}}$ ),
- mutual penetration of hydrogen and acceptor atom ( $\Delta r_H = r_{\text{monomer}}^H - r_{\text{complex}}^H$ ,  $\Delta r_B = r_{\text{monomer}}^B - r_{\text{complex}}^B$ ).

As could be expected, all the criteria are all met for the H<sub>2</sub>O-NMF complexes. Similarly, one can observe  $\Delta q(H) > 0$ ,  $\Delta E(H) > 0$ ,  $\Delta M(H) < 0$ ,  $\Delta V(H) < 0$ ,  $\Delta r_H > 0$ , and  $\Delta r_B > 0$  for the CO, I and N<sub>2</sub>, I complexes, though some of these values are rather small. But it can be attributed to very weak nature of the hydrogen bond present in these molecules. For the CO, IV and N<sub>2</sub>, IV complexes two conditions are not fulfilled ( $\Delta E(H) > 0$ ,  $\Delta V(H) < 0$ ). For the CO, III and N<sub>2</sub>, III complexes all these criteria are met, but as it was mentioned before, the  $\nabla^2 \rho$  values are too small. Moreover, closer inspection of the mutual penetration in this molecules, shows that  $\Delta r_H$  and  $\Delta r_B$  values are closer to those in van der Waals complexes with argon, than in hydrogen-bonded ones. And finally remains the most problematic complex with N<sub>2</sub> (II). Though all the conditions are met, very low values of  $\nabla^2 \rho$ ,  $\Delta q(H)$ ,  $\Delta E(H)$ ,  $\Delta M(H)$ , and specially  $\Delta V(H)$ , do not lead us to consider this interaction as hydrogen bond.
